# Supplementary figures and images for: Gene Expression Profile in Similar Tissues Using Transcriptome Sequencing Data of Whole-Body Horse Skeletal Muscle
Source: MDPI journal article supplement (doi:10.3390/genes11111359), 2020-11-17

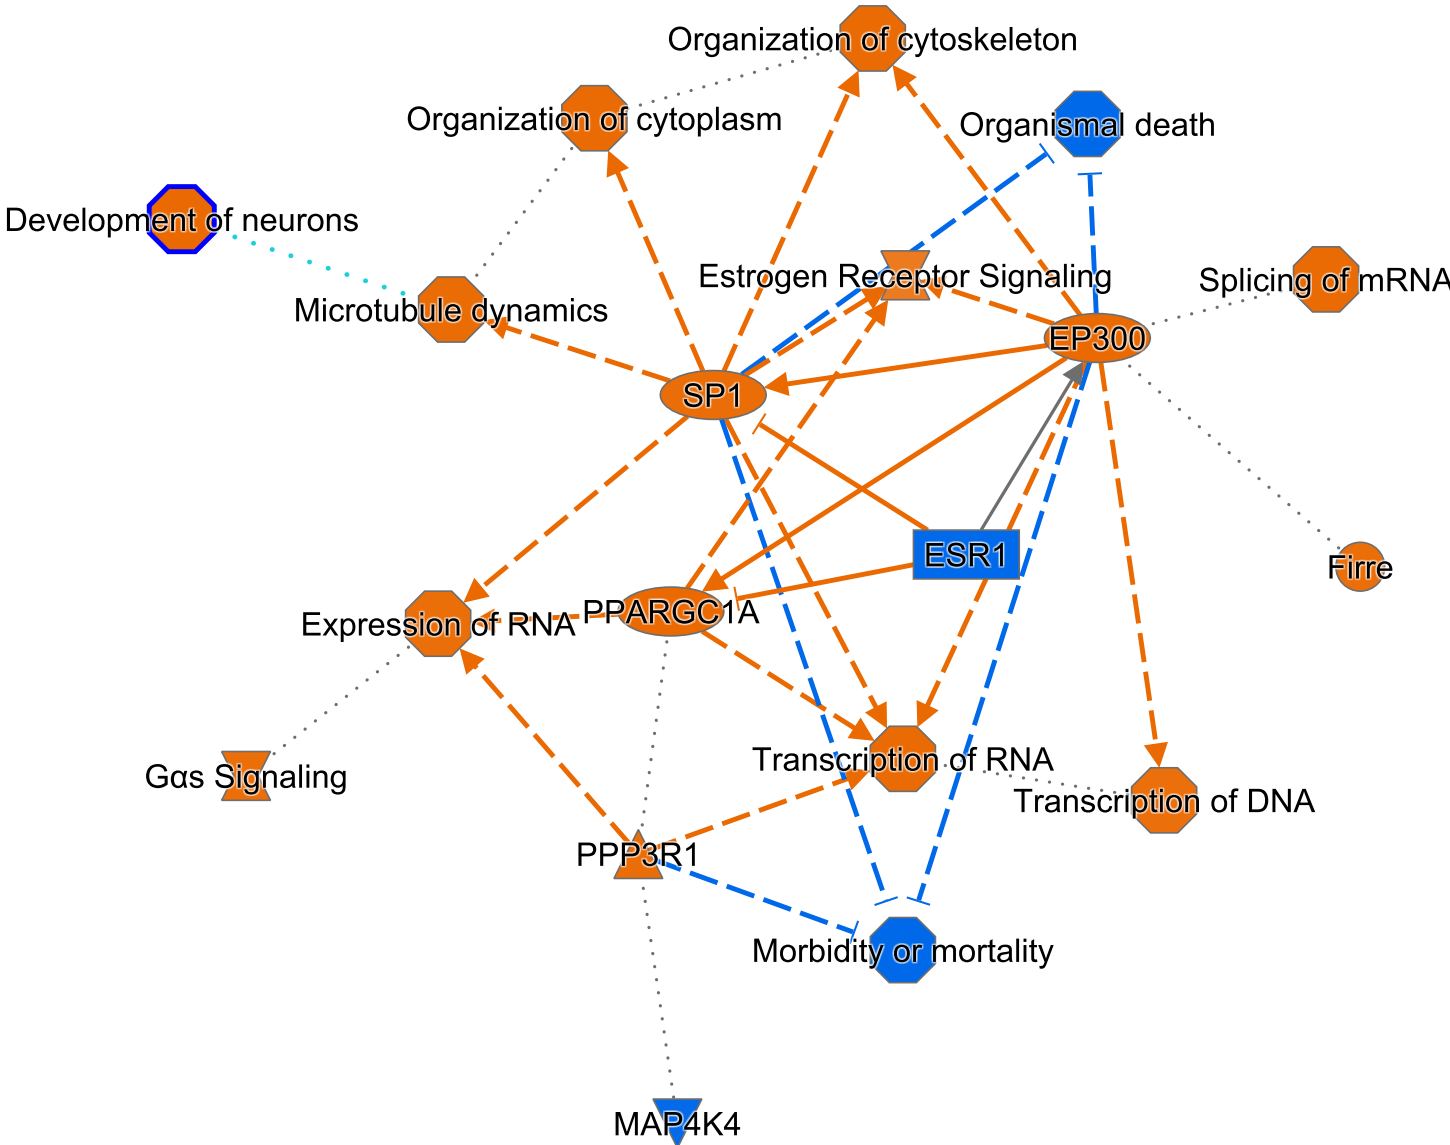

Supplement: s1 [file s1]
